# Supplementary material for: Early Predictors of Disability and Cognition in Multiple Sclerosis Patients: A Long-Term Retrospective Analysis
Source: MDPI journal article supplement (doi:10.3390/jcm12020685), 2023-01-15
Supplement: s1 [file s1]

## Supplementary Materials

**Table S1.** Comparison of cognitive performances based on cerebellar involvement at baseline.

|                            | Patients without cerebellar involvement |                         |                           | Patients with cerebellar involvement |                         |                           | P values* |
|----------------------------|-----------------------------------------|-------------------------|---------------------------|--------------------------------------|-------------------------|---------------------------|-----------|
| Test                       | Raw<br>(mean ± SD)                      | Adjusted<br>(mean ± SD) | Equivalent<br>(mean ± SD) | Raw<br>(mean ± SD)                   | Adjusted<br>(mean ± SD) | Equivalent<br>(mean ± SD) |           |
| <b>BDI*</b>                | 9.2 ±7.8                                | -                       | -                         | 14.2±9.5                             | -                       | -                         | 0.03      |
| <b>Corsi Span</b>          | 5.2±1.4                                 | 4.9 ±1.3                | 2.9 ± 1.6                 | 4.7±1.0                              | 4.4±1.0                 | 2.4±1.7                   | 0.1       |
| <b>Short story</b>         | 17.4±4.7                                | 16.1 ±4.4               | 3.4 ±1.2                  | 13.5±5.3                             | 12.5±4.6                | 2.6±1.6                   | 0.01      |
| <b>Digit span forward</b>  | 6.1±1.1                                 | 5.8 ±1.1                | 3.5 ±0.9                  | 5.5±1.2                              | 5.2±1.0                 | 2.9±1.3                   | 0.08      |
| <b>Digit span backward</b> | 4.3±1.0                                 | -                       | -                         | 3.6±1.1                              | -                       | -                         | 0.02      |
| <b>Phonetic fluency</b>    | 37.1±10.1                               | 34.4±9.4                | 3.2±1.1                   | 30.3±9.2                             | 28.8±9.5                | 2.5±1.3                   | 0.03      |
| <b>Semantic fluency</b>    | 48.2 ±11.6                              | 46.0 ±11.2              | 3.6±0.9                   | 42.6±12.7                            | 41.4±11.3               | 3.2±1.1                   | 0.05      |
| <b>TMTa</b>                | 31.7±19.0                               | 27.5±19.2               | 3.7±0.9                   | 49.0±30.7                            | 46.1±28.1               | 3.2±1.2                   | 0.02      |
| <b>TMTb</b>                | 79.6±55.5                               | 69.8±59.0               | 3.6±1.2                   | 109.8±68.0                           | 109.2±64.4              | 3.0±1.4                   | 0.05      |
| <b>TMT b-a</b>             | 48.1±45.6                               | 42.3±47.3               | 3.4±1.3                   | 64.9±55.8                            | 64.9±51.6               | 3.1±1.4                   | 0.2       |
| <b>Cognitive estimates</b> | 13.5±4.2                                | 13.5±3.6                |                           | 16.6±3.8                             | 16.24±3.8               | -                         | 0.01      |
| <b>SDMT</b>                | 49.4±14.7                               | 48.1±10.7               | -                         | 38.4±13.5                            | 37.4±13.2               | -                         | 0.02      |
| <b>Weigl test</b>          | 16.0±22.3                               | 12.13 ±2.9              | 3.1 ±1.1                  | 11.0±2.9                             | 11.05±2.7               | 2.2±1.2                   | 0.01      |
| <b>Raven's matrices</b>    | 30.5±5.2                                | 29.9±4.6                | 3.2±1.1                   | 28.6±5.3                             | 28.3±4.9                | 2.7±1.1                   | 0.08      |
| <b>PASAT 2' (errors)</b>   | 49.4±14.7                               | -                       | -                         | 34.8±8.8                             | -                       | -                         | 0.0005    |

\*pvalue obtained with Mann-Whitney test and referred to differences between equivalent values or when not available between adjusted or raw values

Abbreviations: BDI: SDMT: symbol digit modalities test; TMT: trail making test; PASAT. SD: standard deviation.

**Table S2.** Predictive factors at Ms diagnosis for long term cognition. N:65

|               |            | Beta          | 95% CI          | P value      |
|---------------|------------|---------------|-----------------|--------------|
| <b>Model*</b> | EDSS       | -0.048        | -0.134 – 0.087  | 0.469        |
|               | Cerebellum | 0.135         | -0.109 – 0.368  | 0.282        |
|               | WMLL       | <b>0.265</b>  | 0.017 – 0.479   | <b>0.036</b> |
|               | Age        | 0.052         | -0.009 – 0.014  | 0.667        |
|               | D.D        | <b>0.293</b>  | 0.005 – 0.035   | <b>0.01</b>  |
|               | E.L        | <b>-0.320</b> | -0.073 - -0.012 | <b>0.007</b> |
|               | Any DMTs   | -0.102        | -0.337 - 0.131  | 0.382        |

\*Model considering cognition as a dependent variable and EDSS, cerebellum involvement, EDSS, WMLL, and educational level as independent variables. CI was defined with the presence of at least 2 severely altered tests at NPS evaluation at T1. **Abbreviations:** CI: cognitive impairment, DD: disease duration from the onset, DMT: disease modifying treatment, EDSS: expanded disability status score, EL: educational level, Ms: Multiple sclerosis, NPS: neuropsychological, WMLL= white matter lesion load

**Table S3.** Motor disability and prognostic factors. Group comparison and correlation analyses.

|                                               | a)<br>EDSS<4<br>(N49) | b)<br>EDSS≥4<br>(N16) | p-<br>value<br>a) vs<br>b) | MSSS<br>T1<br>(N65)       | ARMSS<br>T1<br>(N65)      | EDSS<br>T1<br>(N65)       |
|-----------------------------------------------|-----------------------|-----------------------|----------------------------|---------------------------|---------------------------|---------------------------|
| <b>Age at onset;</b><br>mean±SD               | 31.06 ± 9.53          | 34.94 ± 7.48          | 0.1                        | <i>r:0.26 p:0.03</i>      | r:-0.18 p:0.1             | r:0.14 p:0.2              |
| <b>Age at diagnosis;</b><br>mean±SD           | 34.20 ±10.23          | 40.0 ± 7.46           | <b>0.03</b>                | <i>r:0.29 p:0.01</i>      | r:-0.12 p:0.3             | r:0.22 p:0.08             |
| <b>Age at T1; mean±SD</b>                     | 45.84 ± 9.25          | 54.19± 5.02           | <b>0.0008</b>              | <i>r:0.34 p:0.005</i>     | r:0.008 p:0.9             | <i>r:0.38 p:0.01</i>      |
| <b>Sex (% of grand total)</b>                 |                       |                       |                            |                           |                           |                           |
| Female                                        | 56.06%                | 18.18%                | 0.9                        | 2.7±2.3<br>vs 2.4±2.1     | 3.9±2.5<br>vs 3.6±2.4     | 2.9±2<br>vs 2.7±1.9       |
| Male                                          | 19.70%                | 6.06%                 |                            | p0.6                      | p0.7                      | p0.6                      |
| <b>Educational level;</b><br>mean±SD          | 12.22±2.82            | 11.69±3.86            | 0.7                        | r:-0.07 p:0.5             | r:-0.003 p:0.9            | r:0.09 p:0.4              |
| <b>BDI; mean±SD</b>                           | 10.09±8.94            | 14.31±7.28            | <b>0.03</b>                | <i>r:0.36 p:0.003</i>     | <i>r:0.24 p:0.049</i>     | <i>r:0.36 p:0.003</i>     |
| <b>Dd from onset</b><br>mean±SD               | 15.41 ± 6.61          | 19.56 ± 7.15          | <b>0.03</b>                | r:0.02 p0.8               | r:0.17 p0.1               | <i>r:0.31 p:0.01</i>      |
| <b>Dd from diagnosis</b><br>mean±SD           | 12.24 ± 6.36          | 14.50 ± 5.06          | 0.1                        | r:-0.02 p0.8              | r:0.18 p0.1               | <i>r:0.26 p0.03</i>       |
| <b>ARR mean±SD</b>                            | 0.47 ± 0.49           | 0.6 ± 0.32            | 0.08                       | r:0.20 p0.1               | <i>p:0.43 p0.006</i>      | r:0.21 p0.09              |
| <b>EDSS at T0;</b><br>mean±SD                 | 0.93± 0.84            | 1.81± 0.99            | <b>0.003</b>               | <i>r:0.54 p&lt;0.0001</i> | <i>r:0.49 p&lt;0.0001</i> | <i>r:0.51 p&lt;0.0001</i> |
| <b>EDSS at T1;</b><br>mean±SD                 | 1.85± 0.86            | 6.03 ±1.04            | <b>&lt;0.0001</b>          | -                         | -                         | -                         |
| <b>MSSS at T1;</b><br>mean±SD                 | 1.52 ± 1.09           | 6.13 ± 1.42           | <b>&lt;0.0001</b>          | -                         | -                         | -                         |
| <b>ARMSS at T1;</b><br>mean±SD                | 2.74 ± 1.68           | 7.16 ± 1.30           | <b>&lt;0.0001</b>          | -                         | -                         | -                         |
| <b>Recovery from onset (% of grand total)</b> |                       |                       |                            |                           |                           |                           |
| Yes                                           | 50.7%                 | 10.7%                 |                            | 2.1±1.7<br>vs 3.5±2.7     | 3.2±2.1<br>vs 4.7±2.7     | 3.4±2.4<br>vs 2.5±1.6     |
| no                                            | 24.6%                 | 13.8%                 | 0.9                        | <i>p0.049</i>             | <i>p0.03</i>              | p0.1                      |
| <b>Type of onset (% of grand total)</b>       |                       |                       |                            |                           |                           |                           |
| Sensory/pyramidal                             | 12.3%                 | 40%                   |                            |                           |                           |                           |
| Brainstem/cerebellar                          | 4.6%                  | 7.7%                  |                            |                           |                           |                           |
| Optic neuritis                                | 4.6%                  | 18.5%                 |                            |                           |                           |                           |
| Myelitis                                      | 3.1%                  | 9,2%                  | p:0.8                      | p:0.7                     | p:0.2                     | p:0.6                     |
| <b>Type of MS at T0 (% of grand total)</b>    |                       |                       |                            |                           |                           |                           |
| RR                                            | 75%                   |                       |                            | 2.6±1.9<br>vs 7.7±0.      | 3.5±2.2<br>vs 8.6±0.2     | 2.6±1.5<br>vs 7.1±0.2     |
| PP                                            | 18.7%                 | 0%                    |                            | <i>p&lt;0.0001</i>        | <i>p&lt;0.0001</i>        | <i>p&lt;0.0001</i>        |
|                                               |                       | 6.2%                  | <i>p:0.0003</i>            |                           |                           |                           |
| <b>Type of MS at T1 (% of grand total)</b>    |                       |                       |                            |                           |                           |                           |
| RR                                            | 71.8%                 |                       |                            |                           |                           |                           |
| PP                                            | 0%                    | 3.1%                  |                            |                           |                           |                           |
|                                               | 3.1%                  | 6.2%                  |                            |                           |                           |                           |

|                                                        |       |                   |                   |                    |                    |
|--------------------------------------------------------|-------|-------------------|-------------------|--------------------|--------------------|
| SP                                                     | 15.6% | <i>p</i> :<0.0001 | <i>p</i> :<0.0001 | <i>p</i> :<0.0001  | <i>p</i> :<0.0001  |
| <b>Spinal (% of grand total)</b>                       |       |                   | 3.1±2.5           | 4.1±2.4            | 3.0±2.0            |
| Yes                                                    | 43.1% | 16.9%             | vs 2±1.8          | vs 3.2±2.4         | vs 2.5±1.8         |
| No                                                     | 32.3% | 7.7%              | p0.06             | p0.09              | p0.2               |
| <b>Cerebellar (% of grand total)</b>                   |       |                   | 3.5±2.7           | 4.8±2.5            | 3.6 ±2.3           |
| Yes                                                    | 23.1% | 16.6%             | vs 2.0±1.8        | vs 3.1±2.2         | vs 2.3 ± 1.6       |
| No                                                     | 52.3% | 7.7%              | <i>p</i> 0.049    | <i>p</i> 0.005     | <i>p</i> 0.040     |
| <b>Gd+ (% of grand total)</b>                          |       |                   | 2.6±2.3           | 3.4±2.4            | 2.8±1.9            |
| Yes                                                    | 33.8% | 15.4%             | vs 2.7±2.3        | vs 4.2±2.4         | vs 2.9±2           |
| no                                                     | 41.5% | 9.2%              | p0.7              | p0.2               | p0.8               |
| <b>WMLL (% of grand total)</b>                         |       |                   | 3.2±2.5           | 4.3±2.5            | 3.2±2.1            |
| Yes                                                    | 36.9% | 13.8%             | vs 2-0±1.9        | vs 3.2±2.4         | vs 2.5±1.8         |
| No                                                     | 38.5% | 10.8%             | <i>p</i> 0.03     | <i>p</i> 0.049     | p0.08              |
| <b>DMT at T1 (% of grand total)</b>                    |       |                   | 2.1±1.7           | 3.4±2              | 2.3±1.5            |
| Yes                                                    | 46.9% | 7.6%              | vs 3.3±2.7        | vs 4.2±2.8         | vs 3.4±2.4         |
| No                                                     | 28.7% | 16.7%             | p0.07             | p0.3               | <i>p</i> 0.049     |
| <b>Any DMT exposure in the past (% of grand total)</b> |       |                   | 2.5±2 vs          | 3±2.3              | 2.5±1.9            |
| Yes                                                    | 51.5% | 18.2%             | 2.8±2.4           | vs 4.1±2.4         | vs 3±2             |
| No                                                     | 24.2% | 6.1%              | p0.4              | p0.08              | p0.4               |
| <b>OCB (% of grand total)</b>                          |       |                   | 3±2vs2.5±1.5      | 2.7±2.4 vs 2.1±1.6 | 3.9±2.5vs 3.2± 2.3 |
| Yes                                                    | 65.6% | 21.9%             | p0.7              | p0.8               | p0.5               |
| No                                                     | 10.9% | 1.6%              |                   |                    |                    |

Group comparison; test used: Mann–Whitney and Kruskal–Wallis tests for continuous variables; Chi-Squared test and Fisher test for categorical variables. **Abbreviations:** ARMSS: age-related MSSS, ARR: annualized relapse rate, DD: disease duration, DMT: disease-modifying treatment, EDSS: expanded disability status score, Gd: gadolinium, OCB: oligoclonal bands, Ms: Multiple sclerosis, MSSS: MS severity score, WMLL: white matter lesion load

**Table S4.** Predictive factors at Ms diagnosis for long-term motor disability. N:65

|                  | Beta   | 95% CI         | P value |
|------------------|--------|----------------|---------|
| <b>Model*</b>    |        |                |         |
| MS Type at T0    | 0.500  | 1.890-4.709    | 0.000   |
| MS Type at T1    | 0.192  | -0.833 – 1.371 | 0.042   |
| DMT at T1        | 0.038  | -0.212 – 0.420 | 0.513   |
| DD from onset    | -0.001 | -0.041 – 0.040 | 0.987   |
| Cerebellum       | 0.075  | -0.187 – 0.798 | 0.219   |
| WMLL             | 0.031  | -0.343 – 0.592 | 0.597   |
| Age at diagnosis | -0.084 | -0.061 - 0.027 | 0.438   |
| Age at T1        | 0.145  | -0.018 – 0.083 | 0.204   |
| EDSS at T0       | 0.239  | 0.251 – 0.761  | 0.000   |

\*Model considering EDSS at T1 as a dependent variable and EDSS at diagnosis, cerebellum involvement, WMLL, MS phenotype at diagnosis and T1 , DMT at T1, disease duration from the onset, age at diagnosis, and at T1 as multiple independent variables. **Abbreviations:** DD: disease duration, DMT: disease-modifying treatment, EDSS: expanded disability status score, Ms: Multiple sclerosis, WMLL= white matter lesion load
